# Supplementary material for: Alternative Splicing of a Multi-Drug Transporter from Pseudoperonospora cubensis Generates an RXLR Effector Protein That Elicits a Rapid Cell Death
Source: PubMed Central journal article supplement (PMC3320632; doi:10.1371/journal.pone.0034701), 2012-04-05
Supplement: pone.0034701.s002.pdf [file pone.0034701.s002.pdf]

*PscRXLR1* 1 MVWLQLKKSGLGFTMSLSAVYGAVYAAAN-SVPAGKIDSGKKAMRHLENLPLLIASDSLE  
*Psc\_781.4* 1 -----MSLSAVYGAVYAAAN-SVPAGKIDSGKKAMRHLENLPLLIASDSLE  
*P. sojae* 156165 1 -----MPLPAVYGAVYATATSSAPAGKIDSGKKAMRHLENLPLLVASDSLE  
*PITG\_17484* 1 -----MPLPAVYGAVYASATSSAPAG-----KKAIRHLENLPLLVASDSLE  
*P. ramorum* 96701\_0\_3435 1 -----MPLPAVYGAVYATATRSAPAGKIDSGKKAMRHLENLPLLIASDSLID  
*PYU1\_T005955* 1 -----MPAPAAVGIAVAAAA-----NTDSGKKAMKQLEELPLLAVRHASD

*PscRXLR1* 60 SVSTEGKWLPRFRLRQAIMRSTIANRIAGIILVSTSAFLASCIATLVKEDAVKLAPVEILFW  
*Psc\_781.4* 46 SVSTEGKWLPRFRLRQAIMRSTIANRIAGIILVSTSAFLASCIATLVKEDAVKLAPVEILFW  
*P. sojae* 156165 47 SMSTDGKWLPRFMRRAVVRSVANRIAGLILVGTSAFLASCIATLVKDDAFKLSIVETLFW  
*PITG\_17484* 42 SMTTEGKWLPRFMRRAVVRSVANRIAGLILVGTSAFLASCIATLVKDDTIKLSAIEALFW  
*P. ramorum* 96701\_0\_3435 47 SMSTEGKWLPRFMRRAVVRSVANRIAGLILVGTSAVLASCIATLTKDADFKLSPVETLFW  
*PYU1\_T005955* 41 AAIRTGSRRLPKLVCKWYSKLSATQLEGVVLVAASAFTFSLISTLTKYASQSMPSMETVFW

*PscRXLR1* 120 RSLVSWLLTLVSS\*-----  
*Psc\_781.4* 106 RSLVSWLLTLVAITTTGVKTRLKKEYRPIVLRSTFGCIATTLTIIMLQELAVSNATAIT  
*P. sojae* 156165 107 RSLVSWLLTLAAIAATGVKMRVKKEFORPLLLRCFTGCIALTLTVLVIQKLEVSNATAIT  
*PITG\_17484* 102 RSLVSWFLTVAALATTSTKMRVKKEFNRPLTLRCVFGCISTTLTIGVLEKLAVSNATAVT  
*P. ramorum* 96701\_0\_3435 107 RSLVSWLLTLAAIAATGIRMRVKKEFHRPLVLRVTCVAMTLLVLQTLAVSNATAIT  
*PYU1\_T005955* 101 RSFVAVLLNLVAVWQ-----MVLADASVLI

*PscRXLR1* -----  
*Psc\_781.4* 166 YFSPLLAFAAAMFLKEKPKLFAVACSVMCVIGAVLVVRPVFLFGKSGSTDASWYRRSMT  
*P. sojae* 156165 167 YLSPLLAFAAAMFFLKEKPGAFTLACSAICVVGAVQVVRPAFVFGKNGSTDAKWYRRSMT  
*PITG\_17484* 162 YVSPLLAFAAMATFFLKEKPGVFTAVCSALCVAGAVLVVRPAFLFGKSGSTDAKWYHRSMA  
*P. ramorum* 96701\_0\_3435 167 YFSPLLAFAAAMFFIKEKPDIFTVACSVVCVAGAILVVRPAFLFGKDGSTDAKWYRRSMA  
*PYU1\_T005955* 126 FTSPVMTFLLGAMVLKEKIDPVNMGYALFSFVGVICVVRPSFIFGNDHTTAG-----

*PscRXLR1* -----  
*Psc\_781.4* 226 SFVTSYLFGESLAIGCAIIVVFMQAGAYVSLRSLQKVPHLVVMHYLVTTTLVSLIP\*----  
*P. sojae* 156165 227 SFVTSYLFGESLAIGCAVTVVFMQAGAYVSLRSLQKVPHLVVMNYFLLTMTLVSLIAILV  
*PITG\_17484* 222 SFVTSNLFGESLAIGCAVVVAFVFMQAGAYVSLRSLHKVEYLVVMQYVLFMTTLAALAAMLG  
*P. ramorum* 96701\_0\_3435 227 SFVTSYLFGESLAIGCAAVVVFVFMQAGAYVSLRSLQKVPHLVVMHYFLLSMTLVSLVAVLV  
*PYU1\_T005955* 178 -----TDGSVFAIMCALIGAAAQAVAYVSMRRLQOVNVLVVINYFLLTSSVMSALSLLI

*PscRXLR1* -----  
*Psc\_781.4* -----  
*P. sojae* 156165 287 VQHGKFKAGLSVETWGAAILGTGALAFAEQLFLTRGFQFDGAGVLAATRLLHVGYEFVWGV  
*PITG\_17484* 282 IQHGKFKAGTSLVETWGAIVGTGALAFVEQLFLTRGFQFDGAGVLAATRLLHVSCEFAWGV  
*P. ramorum* 96701\_0\_3435 287 VQHGKFKTDLISLGTWSAILGTGALAFAEQLFLTRGFQFDGAGVLAATRLLHVGCFAWGV  
*PYU1\_T005955* 232 VQR-KFVIKMSLDVWLAVLGTGFLGFLGQLFLTRGFQLESAGTASVMRYLDVVFVWVDI

PscRXLR1  
Psc\_781.4  
P. sojae 156165 347 ALLGTALNPWSASGAAATAAGVLFLALRRRTARSREALAPHKNAYLH-----FSHARR  
PITG\_17484 342 ILLGTALNPWSAGGAGVTAAGVLFLALRRVHTHWAARRSLRRILQ\*-----  
P. ramorum 96701\_0\_3435 347 ILLGTALNPWSASGAAATAAGVLFLALRRVHTHWAARRSLRRMAAKPHKNAYLHFSSARR  
PYU1\_T005955 291 TLLHERINAWSAVGALICGSAIATAIRKMQS\*-----

PscRXLR1  
Psc\_781.4  
P. sojae 156165 399 DELAAENPSWSVQQVSAELGRQWKALSAAERKPWVELAQFDKARFHTEAHHHV-NQQQSD  
PITG\_17484  
P. ramorum 96701\_0\_3435 407 EQLAEANPAWSVQQVSAELGRQWKSLAAVERKPWVELAQFDKARYHTEAHQHMRQOTDEQ  
PYU1\_T005955

PscRXLR1  
Psc\_781.4  
P. sojae 156165 458 EQPEQAPPKRKKQSNEPRQPDYICFWKSQRPEVVAANPFLAAPLVSKEVGRQWRALSD  
PITG\_17484  
P. ramorum 96701\_0\_3435 467 PERPHLPTKRKKRPNEPRQPDYICFWKSRRPEVIAENPLLAAPSVSREEIARFQP---  
PYU1\_T005955

PscRXLR1  
Psc\_781.4  
P. sojae 156165 518 DERQPTLAATTPDMLSALKTPLKDPFAPKPAKTAQFLFMSHNRESFMLLNMTINEFRAEM  
PITG\_17484  
P. ramorum 96701\_0\_3435 524 -----ALVATSEIPPALKAPLKDPFAPKPAKTGFQFLFMSHNRESFTLLNMTINEFRTEM  
PYU1\_T005955

PscRXLR1  
Psc\_781.4  
P. sojae 156165 578 SQLWKRLSDADKAEWHELAKEDQRRYDTEMNAYKPPAYMDLVVQRSHKRMEELRRLARED  
PITG\_17484  
P. ramorum 96701\_0\_3435 578 SQLWKRLSDADKNEWYELAKLDERRYETEMNAYKPPAYMESAVQRAHKRLDELRLARRD  
PYU1\_T005955

PscRXLR1  
Psc\_781.4  
P. sojae 156165 638 SAAPRLPMNAYNCYLSAKRQELVDRRPGRKNPEIMREIGVTWKALSDDERAVYQRKADED  
PITG\_17484  
P. ramorum 96701\_0\_3435 638 AAAPRLPMNAYNCYLSKERQELAVQRPDLKNPEIMREIGVTWKALSEDERASFQRKAEDD  
PYU1\_T005955

PscRXLR1  
Psc\_781.4  
P. sojae 156165 698 VERFRAEMEAAHIAKKNEEEAANPLTKRRPRKRKEFDDEEELVKTPVPRKKRKS GPPRRP  
PITG\_17484  
P. ramorum 96701\_0\_3435 698 VERFRADMEAYLTQQEEQRAVQEEQDVEPEVVREV VHEVVKEP--VVGRKKRKS VSPRRP  
PYU1\_T005955

PscRXLR1  
Psc\_781.4  
P. sojae 156165 758 KTAYNLMYMSKRTELLSTYQMSHNECSALCGKLWRQMSEAERE PYKRMAAEDKHRYE AEL  
PITG\_17484  
P. ramorum 96701\_0\_3435 756 KTAYNLMYMSKRAELLSTYQMSHNECSALCGRLWRQMSEEERE PYKRMAAEDK RRYETEM  
PYU1\_T005955

PscRXLR1  
Psc\_781.4  
P. sojae 156165 818 QVYNAQQEEANNKTLRDSAGFRHFLEAKRRENEA ISSDEAAAIWQEMTEPHQLLWTE LAR  
PITG\_17484  
P. ramorum 96701\_0\_3435 816 EIYNAEVDAANKKTLRESAGFSYFLEAKRRENEQI SEGEAAAIWRDMLAPHQMLWTE LAS  
PYU1\_T005955

PscRXLR1  
Psc\_781.4  
P. sojae 156165 878 DNKHKTSVERTAVDVLDTLL\*-----  
PITG\_17484  
P. ramorum 96701\_0\_3435 876 DTPAPASSNATHQKGQTMNGGRWTEQEHQSFLAGLR LYGREWKKVAAKIKTRTSAQIRS  
PYU1\_T005955

PscRXLR1  
Psc\_781.4  
P. sojae 156165  
PITG\_17484  
P. ramorum 96701\_0\_3435 936 HAQKYFAKLARDDEM RKHSGLSMIMAGSIGYFSDGGSSVAQNSGDDDAEASDASRQMARA  
PYU1\_T005955

PscRXLR1  
Psc\_781.4  
P. sojae 156165  
PITG\_17484  
P. ramorum 96701\_0\_3435 996 RSAGQSKGTAA ILIAPMGSAVSGLYKQTTGATKKRARA AVTGFDGQLEMGAATSSFPYKL  
PYU1\_T005955

PscRXLR1 -----  
Psc\_781.4 -----  
Psoj<sup>ae</sup>\_156165 -----  
PITG\_17484 -----  
*P. ramorum* 96701\_0\_3435 QKRQNDATRVEYLP<sup>S</sup>QEELLAKASPNLRHRLSSLIEAELCALQVLSCYAMLQQEQISAP  
PYU1\_T005955 -----

PscRXLR1 -----  
Psc\_781.4 -----  
Psoj<sup>ae</sup>\_156165 -----  
PITG\_17484 -----  
*P. ramorum* 96701\_0\_3435 1116 RQKTKRQGSAKASTLGLPMLSTEQMPPTSSIIY\*  
PYU1\_T005955 -----
