# Supplementary material for: Alternative Splicing of a Multi-Drug Transporter from Pseudoperonospora cubensis Generates an RXLR Effector Protein That Elicits a Rapid Cell Death
Source: PubMed Central journal article supplement (PMC3320632; doi:10.1371/journal.pone.0034701), 2012-04-05
Supplement: pone.0034701.s004.pdf [file pone.0034701.s004.pdf]

**A**

```

781_4 exon 1(last 100 bp)      TGCCAGCTGC ATCGCGACGT TGGTGAAAGA GGACGCCGTT AAATTAGCAC
781_4 exon1 F primer          -----
4 dpi #6-8                   -----
8 dpi #4-12                  -----
SP #5-9                       -----
INTRON 1                     -----
781_4 intron 1 span R primer  -----
781_4 exon 2 (first 100 bp)  -----

781_4 exon 1(last 100 bp)      CCGTGGAGAT TTTGTTTTGG CGCTCACTCG TGTCTGGCT GCTAACGCTT
781_4 exon1 F primer          -----TTGG CGCTCACTCG TGTCTTG-----
4 dpi #6-8                   -----TTGG CGCTCACTCG TGTCTGGCT GCTAACGCTT
8 dpi #4-12                  -----TTGG CGCTCACTCG TGTCTGGCT GCTAACGCTT
SP #5-9                       -----TTGG CGCTCACTCG TGTCTGGCT GCTAACGCTT
INTRON 1                     -----
781_4 intron 1 span R primer  -----
781_4 exon 2 (first 100 bp)  -----

781_4 exon 1(last 100 bp)      -----
781_4 exon1 F primer          -----
4 dpi #6-8                   GTAAGCTCTT GACCCACTGA TATTGTACGA TGATTGCCTA ACAAATTCTT
8 dpi #4-12                  GTAAGCTCTT GACCCACTGA TATTGTACGA TGATTGCCTA ACAAATTCTT
SP #5-9                       GTAAGCTCTT GACCCACTGA TATTGTACGA TGATTGCCTA ACAAATTCTT
INTRON 1                     GTAAGCTCTT GACCCACTGA TATTGTACGA TGATTGCCTA ACAAATTCTT
781_4 intron 1 span R primer  -----
781_4 exon 2 (first 100 bp)  -----

781_4 exon 1(last 100 bp)      -----
781_4 exon1 F primer          -----
4 dpi #6-8                   GGTGATTGAT TACAAGGTTG CAATCACGAC TACTGGCGTT AAG-----
8 dpi #4-12                  GGTGATTGAT TACAAGGTTG CAATCACGAC TACTGGCGTT AAG-----
SP #5-9                       GGTGATTGAT TACAAGGTTG CAATCACGAC TACTGGCGTT AAG-----
INTRON 1                     GGTGATTGAT TACAAG-----
781_4 intron 1 span R primer  -----G CAATCACGAC TACTGGCGTT AAG-----
781_4 exon 2 (first 100 bp)  -----GTTG CAATCACGAC TACTGGCGTT AAGACGCGCT

781_4 exon 1(last 100 bp)      -----
781_4 exon1 F primer          -----
4 dpi #6-8                   -----
8 dpi #4-12                  -----
SP #5-9                       -----
INTRON 1                     -----
781_4 intron 1 span R primer  -----
781_4 exon 2 (first 100 bp)  TGAAGAAAGA GTATTATCGC CCAATCGTGC TTCGATCATT CACGGGTGTC

781_4 exon 1(last 100 bp)      -----
781_4 exon1 F primer          -----
4 dpi #6-8                   -----
8 dpi #4-12                  -----
SP #5-9                       -----
INTRON 1                     -----
781_4 intron 1 span R primer  -----
781_4 exon 2 (first 100 bp)  ATCGCCACGA CACTTA

```

**B**

```

781_4 exon1 (last 100 bp)      TGCCAGCTGC ATCGCGACGT TGGTGAAAGA GGACGCCGTT AAATTAGCAC
781_4 exon1 F primer          -----
4 dpi #3-1                   -----
8 dpi #4-7                   -----
SP #2-3                       -----
781_4 intron 1 span R primer  -----
781_4 exon 2 (first 100 bp)  -----

781_4 exon1 (last 100 bp)      CCGTGGAGAT TTTGTTTTGG CGCTCACTCG TGTCTGGCT GCTAACGCTT
781_4 exon1 F primer          -----TTGG CGCTCACTCG TGTCTTG---
4 dpi #3-1                   -----TTGG CGCTCACTCG TGTCTGGCT GCTAACGCTT
8 dpi #4-7                   -----TTGG CGCTCACTCG TGTCTGGCT GCTAACGCTT
SP #2-3                       -----TTGG CGCTCACTCG TGTCTGGCT GCTAACGCTT
781_4 intron 1 span R primer  -----
781_4 exon 2 (first 100 bp)  -----

781_4 exon1 (last 100 bp)      -----
781_4 exon1 F primer          -----
4 dpi #3-1                   GTTGCAATCA CGACTACTGG CGTTAAG---
8 dpi #4-7                   GTTGCAATCA CGACTACTGG CGTTAAG---
SP #2-3                       GTTGCAATCA CGACTACTGG CGTTAAG---
781_4 intron 1 span R primer  ---GCAATCA CGACTACTGG CGTTAAG---
781_4 exon 2 (first 100 bp)  GTTGCAATCA CGACTACTGG CGTTAAGACG CGCTTGAAGA AAGAGTATTA

781_4 exon1 (last 100 bp)      -----
781_4 exon1 F primer          -----
4 dpi #3-1                   -----
8 dpi #4-7                   -----
SP #2-3                       -----
781_4 intron 1 span R primer  -----
781_4 exon 2 (first 100 bp)  TCGCCAATC GTGCTTCGAT CATTACGGG TTGCATCGCC ACGACACTTA

```
